# Supplementary material for: NS3 helicase inhibitory potential of the marine sponge Spongia irregularis
Source: Royal Society of Chemistry journal article supplement (doi:10.1039/d1ra08321j), 2022-01-01
Supplement: d1ra08321j1.pdf [file d1ra08321j1.pdf]

## NS3 helicase inhibitory potential of the marine sponge *Spongia irregularis*

Enas Reda Abdelaleem<sup>a,ϕ</sup>, Mamdouh Nabil Samy<sup>a,ϕ</sup>, Taha F. S. Ali<sup>b</sup>, Muhamad Mustafa<sup>c</sup>, Mahmoud A. A. Ibrahim<sup>d</sup>, Gerhard Bringmann<sup>e</sup>, Safwat A. Ahmed<sup>f</sup>, Usama Ramadan Abdelmohsen<sup>a,ϕ,\*</sup>, Samar Yehia Desoukey<sup>a</sup>

<sup>a</sup>Department of Pharmacognosy, Faculty of Pharmacy, Minia University, 61519Minia, Egypt.

<sup>b</sup>Department of Medicinal Chemistry, Faculty of Pharmacy, Minia University, 61519 Minia, Egypt.

<sup>c</sup>Medicinal Chemistry Department, Faculty of Pharmacy, Deraya University, New Minia 61111, Egypt.

<sup>d</sup>Computational Chemistry Laboratory, Chemistry Department, Faculty of Science, Minia University, 61519Minia, Egypt.

<sup>e</sup>Institute of Organic Chemistry, University of Würzburg, Am Hubland, 97074 Würzburg, Germany.

<sup>f</sup>Department of Pharmacognosy, Faculty of Pharmacy, Suez Canal University, Ismailia 41522, Egypt.

<sup>g</sup>Department of Pharmacognosy, Faculty of Pharmacy, Deraya University, New Minia 61111, Egypt.

\* Corresponding author, <sup>ϕ</sup> Equal contribution.

**Table S1:** List of secondary metabolites annotated from the ethyl acetate fraction of *Spongia irregularis*.

| N. | Compound                               | Accurate mass | Mode | <i>m/z</i> | <i>R<sub>t</sub></i> | Structure                                                                            | Source                 | Reference    |
|----|----------------------------------------|---------------|------|------------|----------------------|--------------------------------------------------------------------------------------|------------------------|--------------|
| 5  | 19,20 Dihydroxyspongia-13(16),14-diene | 318.2195      | +    | 319.2233   | 3.40                 | 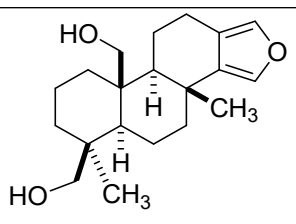   | <i>Spongia</i> Sp.     | <sup>1</sup> |
| 6  | 3β-Acetoxy-spongia-13(16),14-diene     | 344.2351      | -    | 343.2258   | 2.32                 |    | <i>Spongia</i> Sp.     | <sup>2</sup> |
| 7  | 3α-Acetoxy-spongia-13(16),14-diene     |               |      |            |                      |   | <i>Spongia</i> Sp.     |              |
| 8  | Ceylonamide H                          | 345.2304      | +    | 346.2391   | 2.33                 |  | <i>Spongia</i> Sp.     | <sup>3</sup> |
| 9  | 5-Epi-isospongiaquinone                | 358.2114      | -    | 357.2039   | 2.86                 |  | <i>Spongia hispida</i> | <sup>4</sup> |

|    |                                       |          |   |          |      |                                                                                      |                         |              |
|----|---------------------------------------|----------|---|----------|------|--------------------------------------------------------------------------------------|-------------------------|--------------|
| 10 | Spongiacysteine                       | 363.2079 | - | 362.2035 | 2.95 | 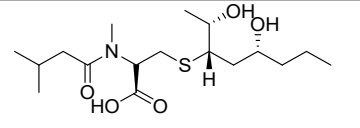   | <i>Spongia</i> Sp.      | <sup>5</sup> |
| 11 | Rhopaloic acid c                      | 372.2664 | + | 373.2638 | 3.03 |    | <i>Hippospongia</i> sp. | <sup>6</sup> |
| 12 | 1,4,44-Trihydroxy-2-octaprenylbenzene | 670.5325 | - | 669.5264 | 3.28 |    | <i>Spongia</i> Sp.      | <sup>7</sup> |
| 13 | Nakijiquinone E                       | 713.4291 | - | 712.4287 | 3.27 |    | <i>Spongia</i> Sp.      | <sup>8</sup> |
| 14 | Nakijiquinone F                       |          |   |          |      |  | <i>Spongia</i> Sp.      |              |

**Table S2:** Docking results of the top-ranked docking pose (Compound **13**) with the active site of HCV NS3 protease compared to the co-crystallized ligand.

| Ligand                 | Binding affinity ( $\Delta G$ in Kcal/mol) | Interaction parameters |            |              |              |
|------------------------|--------------------------------------------|------------------------|------------|--------------|--------------|
|                        |                                            | Interaction            | AA Residue | $\delta$ (Å) | E (Kcal/mol) |
| Co-crystallized ligand | -11.3                                      | H-donor                | Arg 1155   | 2.82         | -4.6         |
|                        |                                            | H-donor                | His 1057   | 3.01         | -7.5         |
|                        |                                            | H-donor                | Ala 1157   | 2.88         | -4.3         |
|                        |                                            | H-acceptor             | Gly 1137   | 3.00         | -1.1         |
|                        |                                            | H-acceptor             | Gly 1137   | 3.02         | -2.8         |
|                        |                                            | H-acceptor             | Ala 1157   | 2.95         | -3.7         |
|                        |                                            | H- $\pi$               | His 1057   | 3.68         | -1.6         |
| <b>13</b>              | <b>-7.0</b>                                |                        |            |              |              |

**Table S3:** Docking results of the top-ranked docking pose (Compound **13**) with HCV NS5B polymerase's active site compared to the co-crystallized ligand.

| Ligand                 | Binding affinity ( $\Delta G$ in Kcal/mol) | Interaction parameters |            |              |              |
|------------------------|--------------------------------------------|------------------------|------------|--------------|--------------|
|                        |                                            | Interaction            | AA Residue | $\delta$ (Å) | E (Kcal/mol) |
| Co-crystallized ligand | -9.6                                       | H-donor                | Asp 318    | 2.71         | -7.2         |
|                        |                                            | H-acceptor             | Ser 556    | 3.11         | -1.0         |
|                        |                                            | H-acceptor             | Asn 291    | 2.88         | -3.5         |
|                        |                                            | H- $\pi$               | Met 414    | 4.77         | -0.5         |
| <b>13</b>              | <b>-9.5</b>                                | H-donor                | Cys 366    | 2.61         | -2.9         |
|                        |                                            | H-acceptor             | Ser 367    | 2.85         | -1.9         |

**Table S4:** Docking results of the top-ranked docking pose (Compound **14**) with the active site of HCV Helicase compared to the co-crystallized ligand.

| Ligand                 | Binding affinity<br>( $\Delta G$ in Kcal/mol) | Interaction parameters |            |              |              |
|------------------------|-----------------------------------------------|------------------------|------------|--------------|--------------|
|                        |                                               | Interaction            | AA Residue | $\delta$ (Å) | E (Kcal/mol) |
| Co-crystallized ligand | -7.5                                          | H-donor                | Trp 501    | 2.81         | -2.3         |
|                        |                                               | H-acceptor             | Gly 255    | 2.91         | -3.5         |
|                        |                                               | H-acceptor             | Gly 255    | 2.92         | -4.6         |
|                        |                                               | H-acceptor             | Thr 269    | 3.52         | -1.9         |
| <b>14</b>              | -7.4                                          | H-donor                | Asn 556    | 3.30         | -0.2         |
|                        |                                               | H-acceptor             | Trp 501    | 2.96         | -1.7         |
|                        |                                               | H- $\pi$               | Trp 501    | 3.84         | -0.4         |
|                        |                                               | H- $\pi$               | Trp 501    | 4.04         | -0.4         |
|                        |                                               | H- $\pi$               | Trp 501    | 4.17         | -0.9         |

**Table S5:** Docking results of the top-ranked docking pose (Compound **14**) with the active site of HCV Protease-Helicase allosteric site compared to the co-crystallized ligand.

| Ligand                 | Binding affinity<br>( $\Delta G$ in Kcal/mol) | Interaction parameters |                            |              |                 |
|------------------------|-----------------------------------------------|------------------------|----------------------------|--------------|-----------------|
|                        |                                               | Interaction            | AA Residue                 | $\delta$ (Å) | E<br>(Kcal/mol) |
| Co-crystallized ligand | -9.0                                          | H-donor                | Asp 79                     | 3.46         | -0.7            |
|                        |                                               | H-donor                | Cys 525                    | 3.00         | -4.2            |
|                        |                                               | H-donor                | H <sub>2</sub> O (Glu 628) | 3.04         | -5.3            |
|                        |                                               | H-donor                | 628)                       | 2.99         | -1.1            |
|                        |                                               | H-acceptor             | Leu 517<br>Cys 525         | 2.97         | -4.8            |
| <b>14</b>              | -10.1                                         | H-donor                | Asp 79                     | 3.58         | -0.3            |
|                        |                                               | H-donor                | Glu 628                    | 3.70         | -0.8            |
|                        |                                               | $\pi$ - H              | Val 524                    | 4.47         | -0.3            |

**Table S6:** Lipinski rule and drug-likeness of isolated and dereplicated compounds **1-14**.

| <b>Molecule</b> | <b>Number of violations (Lipinski rule)</b> | <b>Mwt (g/mol)</b> | <b>H-bond donors</b> | <b>H-bond acceptors</b> | <b>Number of rotatable Bonds</b> | <b>LogP</b> |
|-----------------|---------------------------------------------|--------------------|----------------------|-------------------------|----------------------------------|-------------|
| <b>1</b>        | 0                                           | 193.21             | 1                    | 3                       | 0                                | 0.06        |
| <b>2</b>        | 0                                           | 116.07             | 2                    | 4                       | 0                                | -0.49       |
| <b>3</b>        | 0                                           | 242.23             | 3                    | 5                       | 2                                | -0.61       |
| <b>4</b>        | 0                                           | 118.14             | 1                    | 1                       | 0                                | 1.60        |
| <b>5</b>        | 0                                           | 318.45             | 2                    | 3                       | 2                                | 3.53        |
| <b>6</b>        | 0                                           | 344.49             | 0                    | 3                       | 2                                | 4.75        |
| <b>7</b>        | 0                                           | 344.49             | 0                    | 3                       | 2                                | 4.69        |
| <b>8</b>        | 0                                           | 345.48             | 1                    | 3                       | 1                                | 3.23        |
| <b>9</b>        | 0                                           | 358.47             | 1                    | 4                       | 3                                | 3.84        |
| <b>10</b>       | 0                                           | 363.51             | 3                    | 5                       | 13                               | 2.03        |
| <b>11</b>       | 0                                           | 372.54             | 1                    | 3                       | 11                               | 2.03        |
| <b>12</b>       | 1,<br>Mwt>500                               | 671.05             | 3                    | 3                       | 24                               | 2.03        |
| <b>13</b>       | 2,<br>Mwt>500,<br>LogP>5                    | 713.94             | 4                    | 7                       | 8                                | 7.90        |
| <b>14</b>       | 2,<br>Mwt>500,<br>LogP>5                    | 713.94             | 4                    | 7                       | 8                                | 7.81        |

**Table S7:** Medicinal chemistry properties of isolated and dereplicated compounds as well as their ADME parameters.

| <b>Molecule</b> | <b>GI absorption</b> | <b>Bioavailability score</b> | <b>Pgp substrate</b> | <b>BBB permeation</b> | <b>Synthetic accessibility</b> |
|-----------------|----------------------|------------------------------|----------------------|-----------------------|--------------------------------|
| <b>1</b>        | High                 | 0.55                         | No                   | No                    | 2.34                           |
| <b>2</b>        | High                 | 0.55                         | No                   | No                    | 2.79                           |
| <b>3</b>        | High                 | 0.55                         | No                   | No                    | 3.64                           |
| <b>4</b>        | High                 | 0.55                         | No                   | Yes                   | 1.17                           |
| <b>5</b>        | High                 | 0.55                         | Yes                  | Yes                   | 4.91                           |
| <b>6</b>        | High                 | 0.55                         | No                   | Yes                   | 4.92                           |
| <b>7</b>        | High                 | 0.55                         | No                   | Yes                   | 4.92                           |
| <b>8</b>        | High                 | 0.85                         | Yes                  | Yes                   | 4.66                           |
| <b>9</b>        | High                 | 0.85                         | No                   | Yes                   | 5.10                           |
| <b>10</b>       | High                 | 0.55                         | Yes                  | No                    | 4.60                           |
| <b>11</b>       | High                 | 0.56                         | Yes                  | No                    | 4.60                           |
| <b>12</b>       | High                 | 0.56                         | Yes                  | No                    | 4.60                           |
| <b>13</b>       | Low                  | 0.56                         | Yes                  | No                    | 7.56                           |
| <b>14</b>       | Low                  | 0.56                         | Yes                  | No                    | 7.56                           |

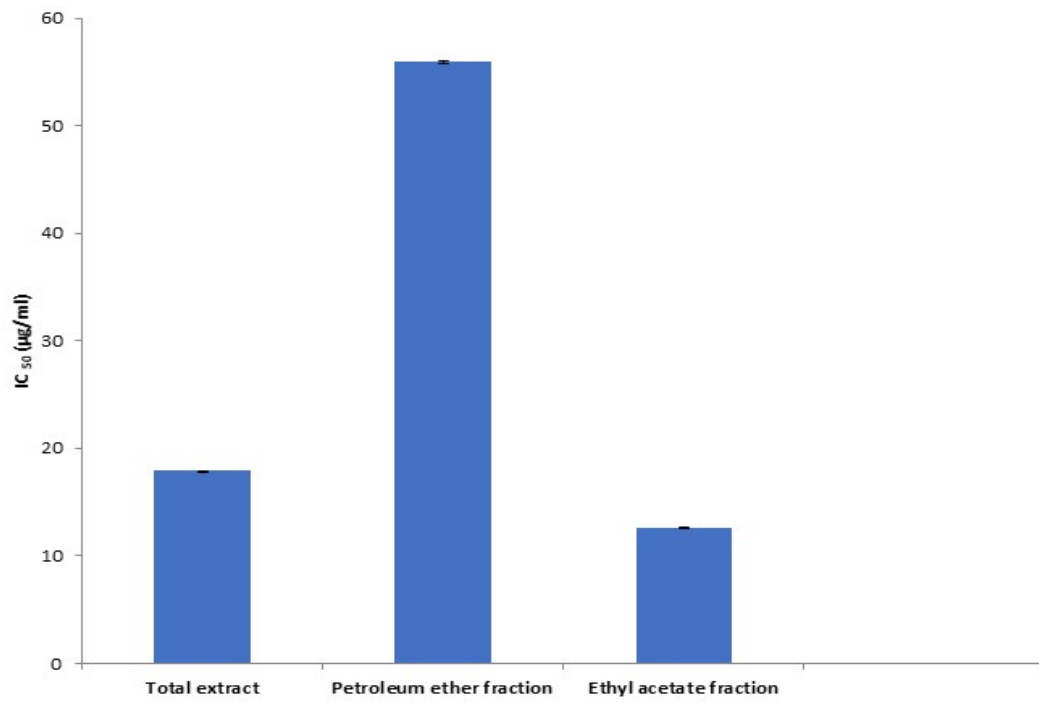

**Figure S1:** IC<sub>50</sub> values of the anti-HCV activities of the total extract and two fractions of *S. irregularis*.

---



**NMR spectroscopic analysis of compound (1-4):**

**1,3,7-Trimethylguanine (1):**

**<sup>1</sup>H NMR (400 MHz, CDCl<sub>3</sub>):** δ= 7.54 (1H, s, H-8), 3.94 (3H, s, N<sub>7</sub>-CH<sub>3</sub>), 3.57 (3H, s, N<sub>3</sub>-CH<sub>3</sub>), 3.39 (3H, s, N<sub>1</sub>-CH<sub>3</sub>).

**<sup>13</sup>C NMR (100 MHz, CDCl<sub>3</sub>):** δ= 155.9 (C-6), 152.2 (C-2), 148.9 (C-4), 141.7 (C-8), 108.1 (C-5), 34.3 (N<sub>7</sub>-CH<sub>3</sub>), 30.5 (N<sub>3</sub>-CH<sub>3</sub>), 28.5 (N<sub>1</sub>-CH<sub>3</sub>).

### **3,5-Dihydroxyfuran-2(5H)-one (2):**

**<sup>1</sup>H NMR (400 MHz, DMSO-*d*<sub>6</sub>):** δ= 10.96 (2H, br s, OH groups), 7.38 (1H, d, *J*=7.6 Hz, H-4), 5.44 (1H, d, *J*=7.6 Hz, H-5)

**APT<sup>13</sup>C NMR (100 MHz, DMSO-*d*<sub>6</sub>):** δ= 165.0 (C-2), 152.2 (C-3), 142.9 (C-4), 100.9 (C-5).

### **Thymidine (3):**

**<sup>1</sup>H NMR (500 MHz, DMSO-*d*<sub>6</sub>):** δ= 11.27 (NH, br s), 7.69 (1H, d, *J*= 1.2 Hz, H-4), 6.15 (1H, t, *J*= 6.3 Hz, H-1'), 5.26 (1H, br s, 3' OH), 5.05 (1H, br s, 5' OH), 4.23 (1H, br s, H-3'), 3.75 (1H, m, H-4'), 3.53 (2H, m, H-5'), 2.02-2.08 (2H, m, H-2'), 1.77 (3H, d, *J*= 1.2 Hz, 5-CH<sub>3</sub>).

**<sup>13</sup>C NMR (125 MHz, DMSO-*d*<sub>6</sub>):** δ= 164.3 (C-6), 150.9 (C-2), 136.6 (C-4), 109.8 (C-5), 87.3 (C-4'), 84.2 (C-1'), 70.9 (C-3'), 61.8 (C-5'), (C-2', Obscured by solvent), 12.7 (5-CH<sub>3</sub>).

### **1H-indazole (4):**

**<sup>1</sup>H NMR (400 MHz, CD<sub>3</sub>OD):** δ= 8.07 (1H, dd, *J*= 1.6, 6.3, H-4), 7.94 (1H, s, H-3), 7.43 (1H, dd, *J*= 1.5, 6.6, H-7), 7.18 (1H, td, *J*= 1.4, 7.1, H-5), 7.15 (1H, td, *J*= 1.4, 7.1, H-6), 4.6 (NH)

**<sup>13</sup>C NMR (100 MHz, CD<sub>3</sub>OD):** δ= 138.9 (C-7a), 133.9 (C-3), 128.4 (C-3a), 124.3 (C-6), 123.0 (C-4), 122.8 (C-5), 113.6 (C-7).

## **NMR spectroscopic analysis of compound (1):**

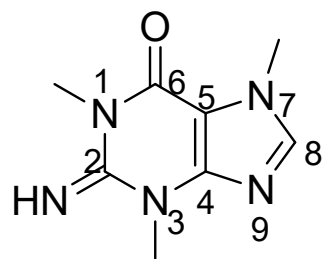

1,3,7-Trimethylguanine

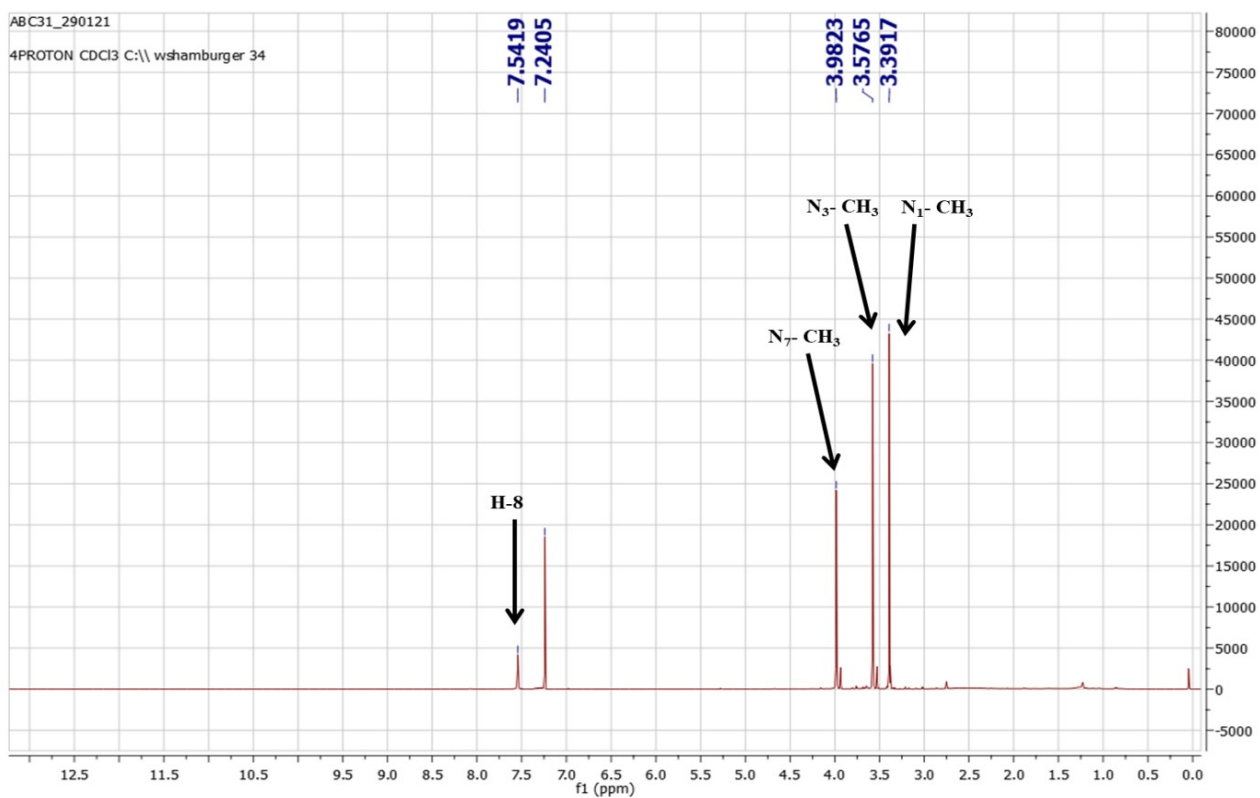

Figure S2: <sup>1</sup>H-NMR spectrum of compound 1 (CDCl<sub>3</sub>, 400 MHz)

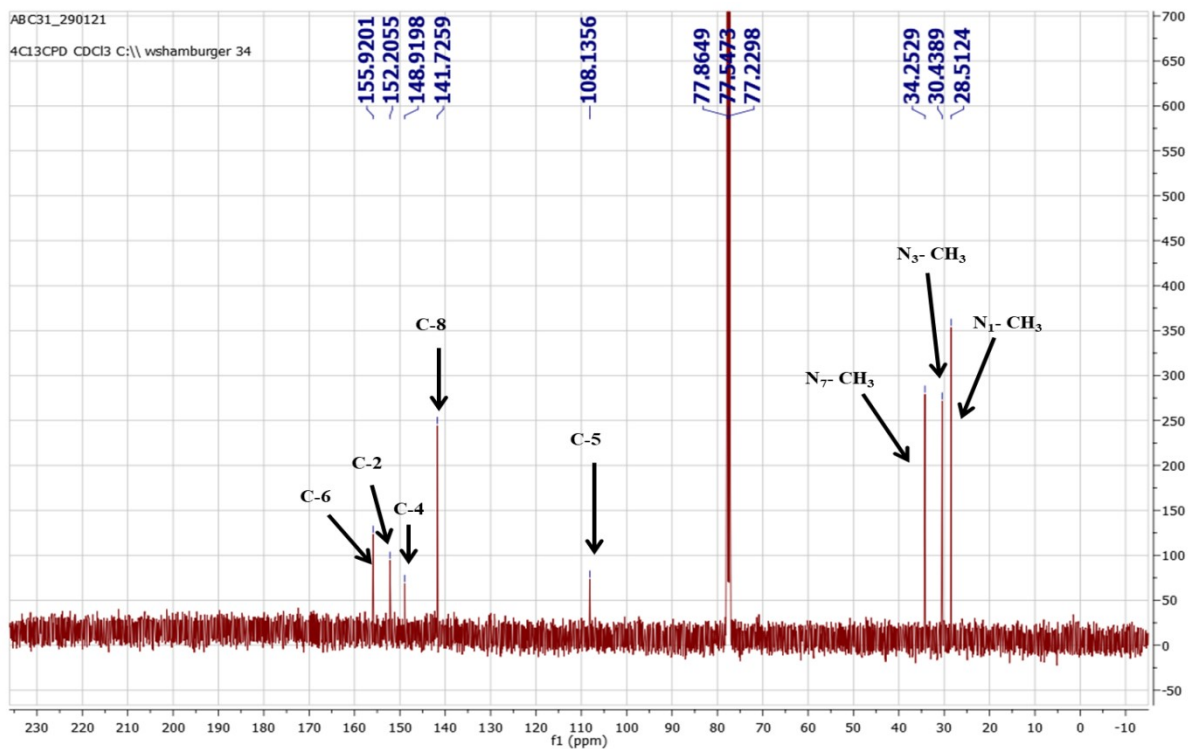

**Figure S3:** <sup>13</sup>C- NMR spectrum of compound **1** (CDCl<sub>3</sub>, 100 MHz)

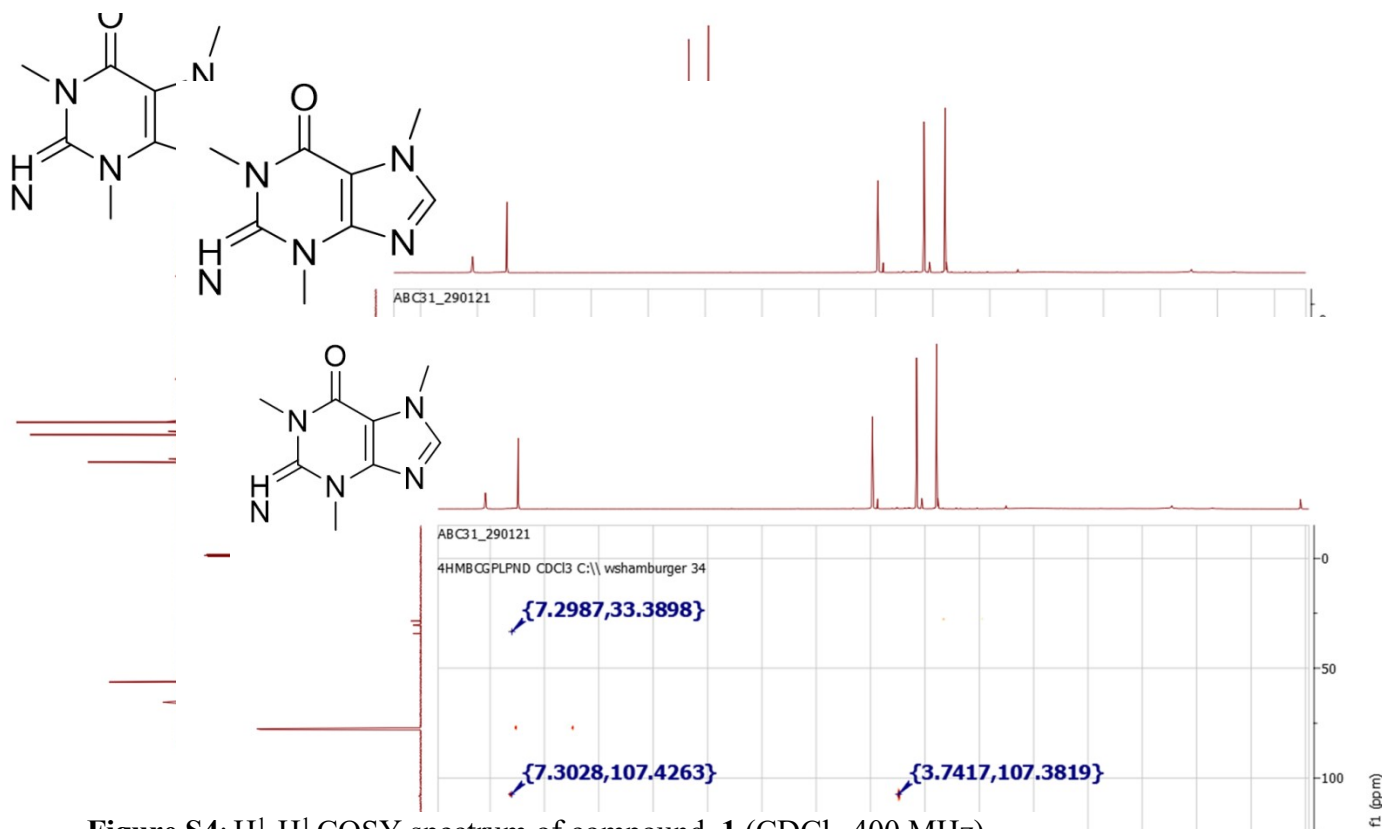

**Figure S4:** H<sup>1</sup>-H<sup>1</sup> COSY spectrum of compound **1** (CDCl<sub>3</sub>, 400 MHz)

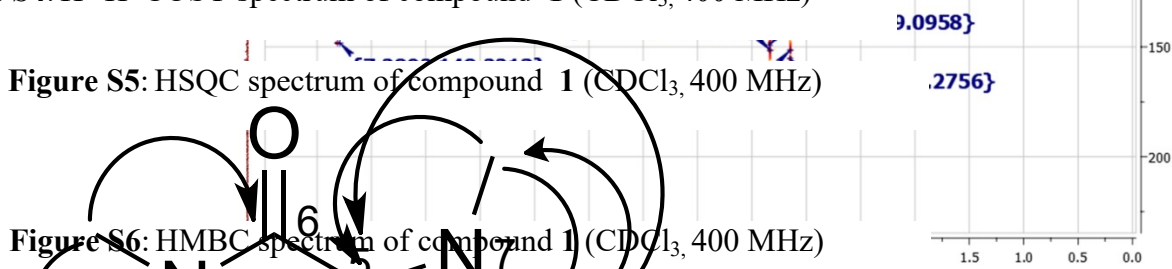

**Figure S5:** HSQC spectrum of compound **1** (CDCl<sub>3</sub>, 400 MHz)

**Figure S6:** HMBC spectrum of compound **1** (CDCl<sub>3</sub>, 400 MHz)

Figure S7: Significant HMBC correlations of compound 1

### NMR spectroscopic analysis of compound (2):

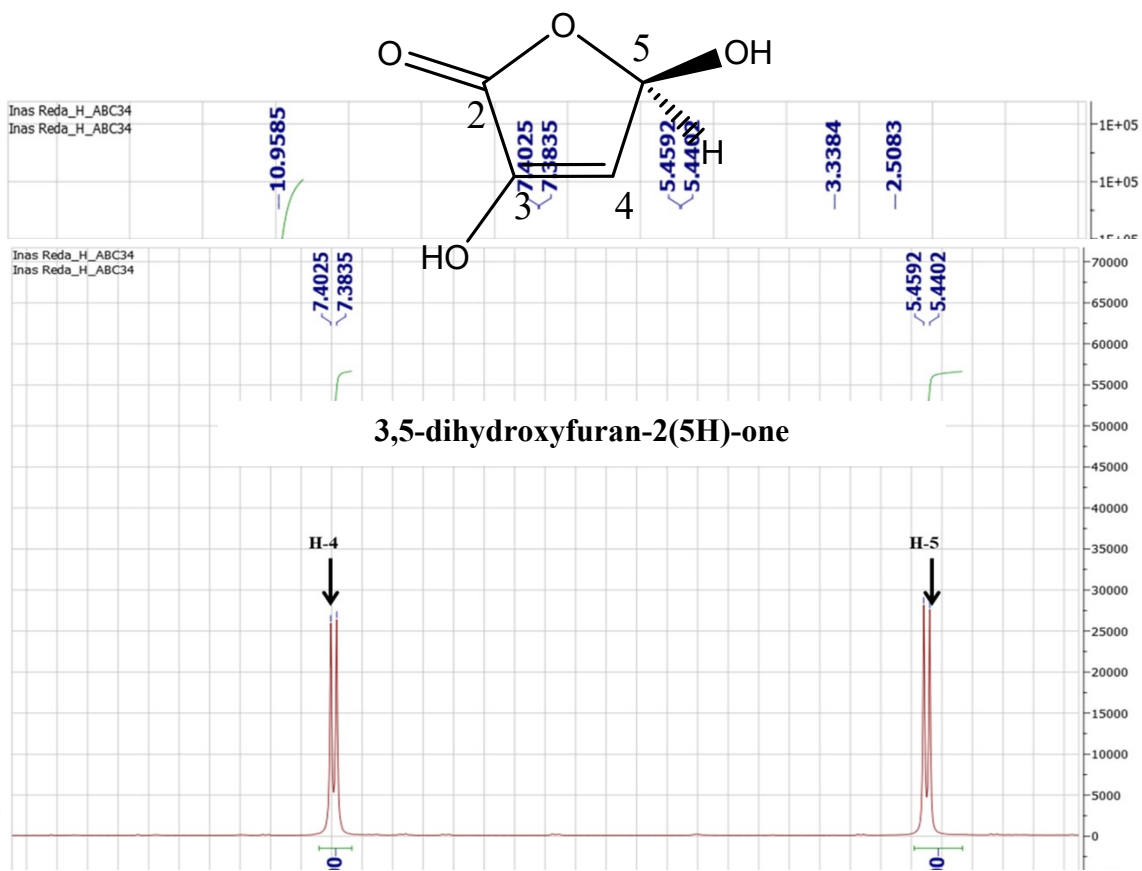

Figure S9: Expanded  $^1\text{H}$ -NMR spectrum of compound 2 (DMSO- $d_6$ , 400 MHz)

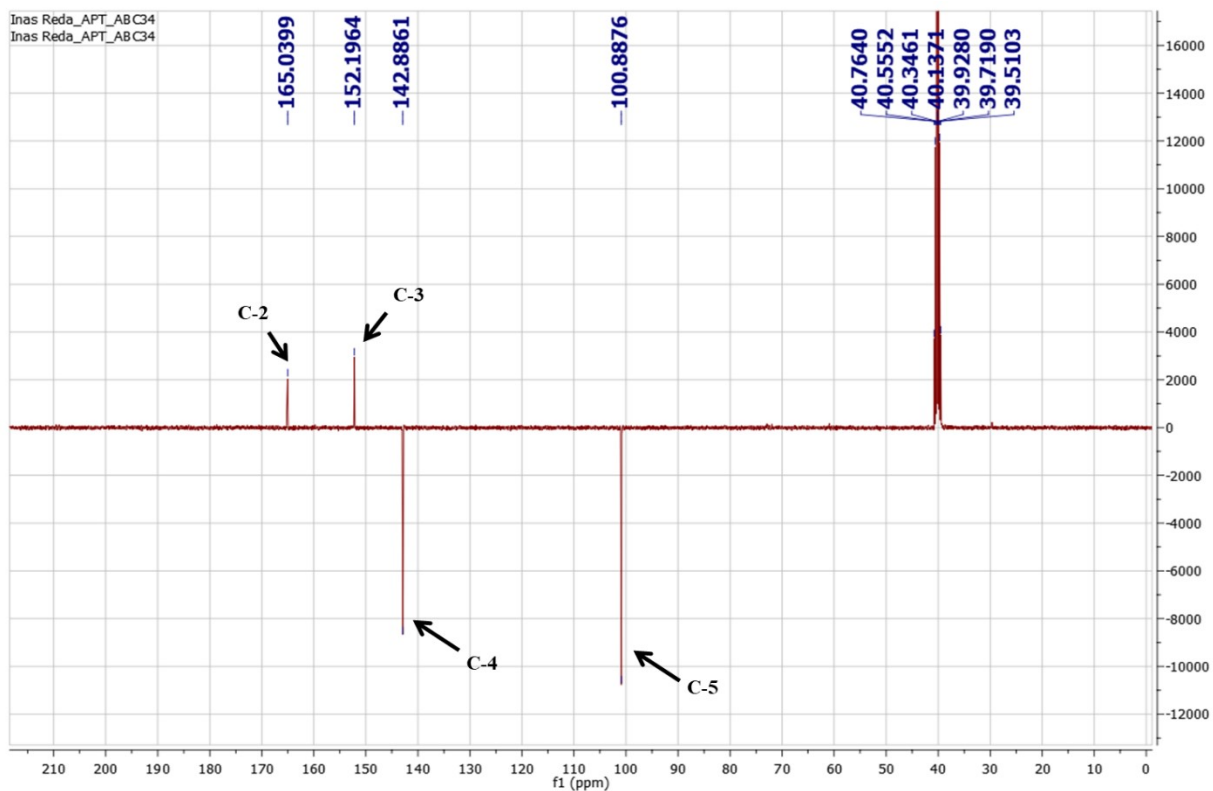

**Figure S10:** APT  $^{13}\text{C}$ - NMR spectrum of compound **2** (DMSO- $d_6$ , 100 MHz)

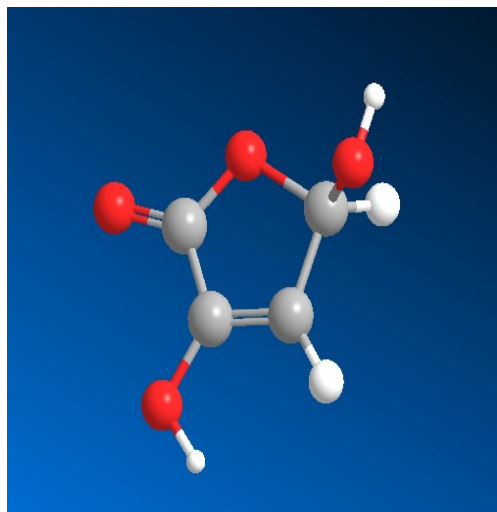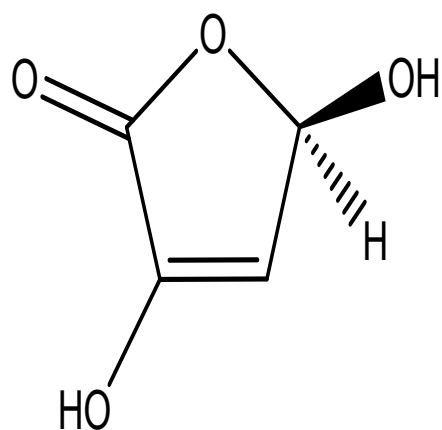

**Figure S11:** 3D structure of  $\alpha$ -oriented proton of compound **2**

**NMR spectroscopic analysis of compound (2):**

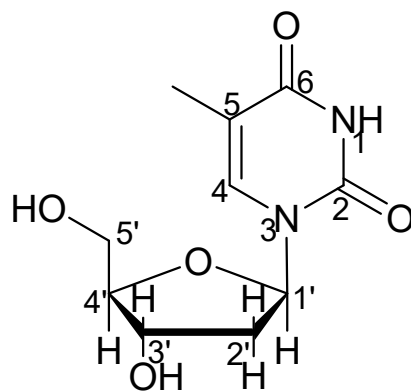

Thymidine

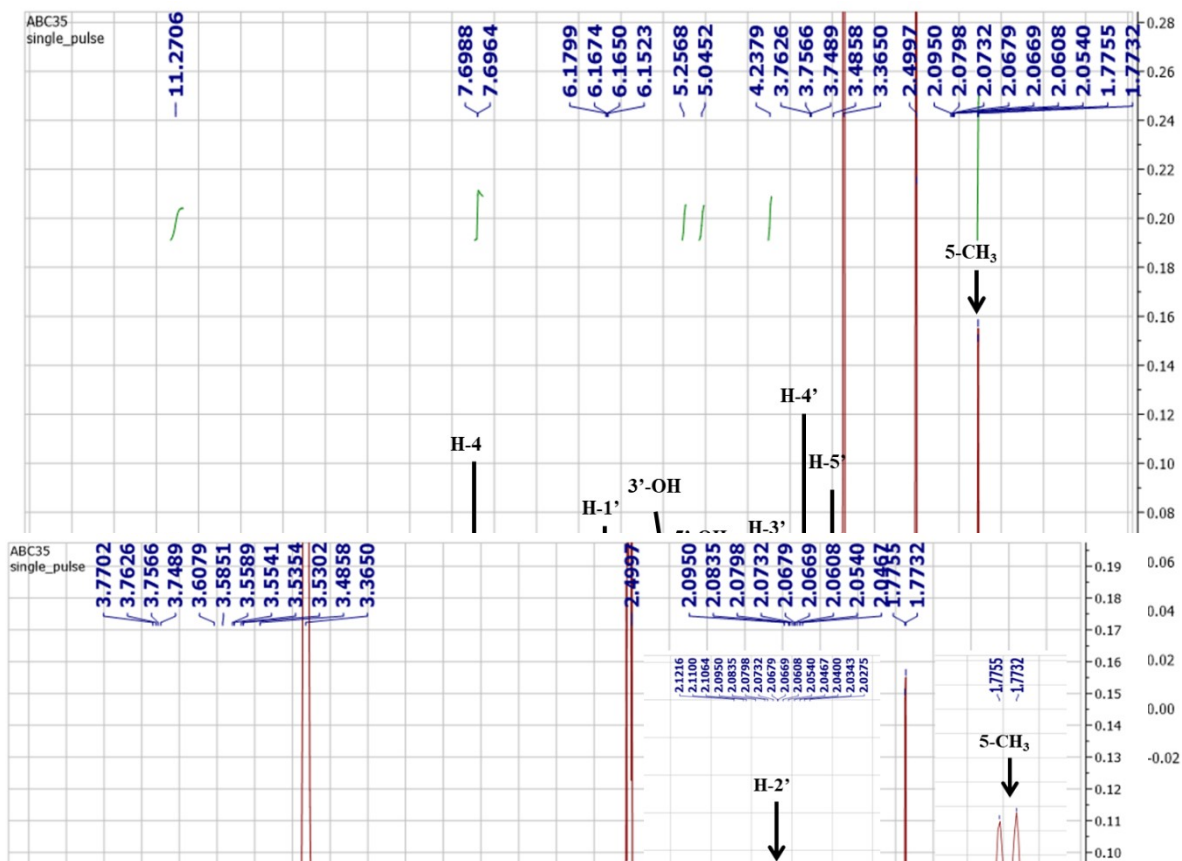

Figure S12:  $^1\text{H-NMR}$  spectrum of compound 3 ( $\text{DMSO-}d_6$ , 500 MHz)

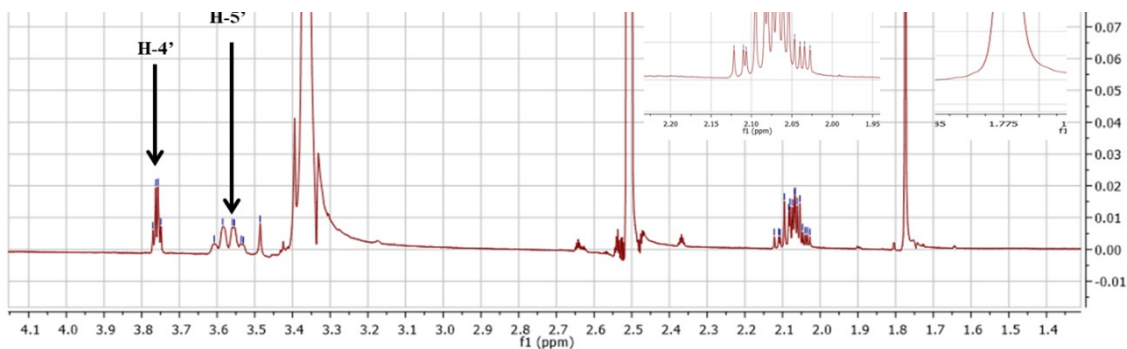

Figure S13: Expanded  $^1\text{H}$ - NMR spectrum of compound **3** (DMSO- $d_6$ , 500 MHz)

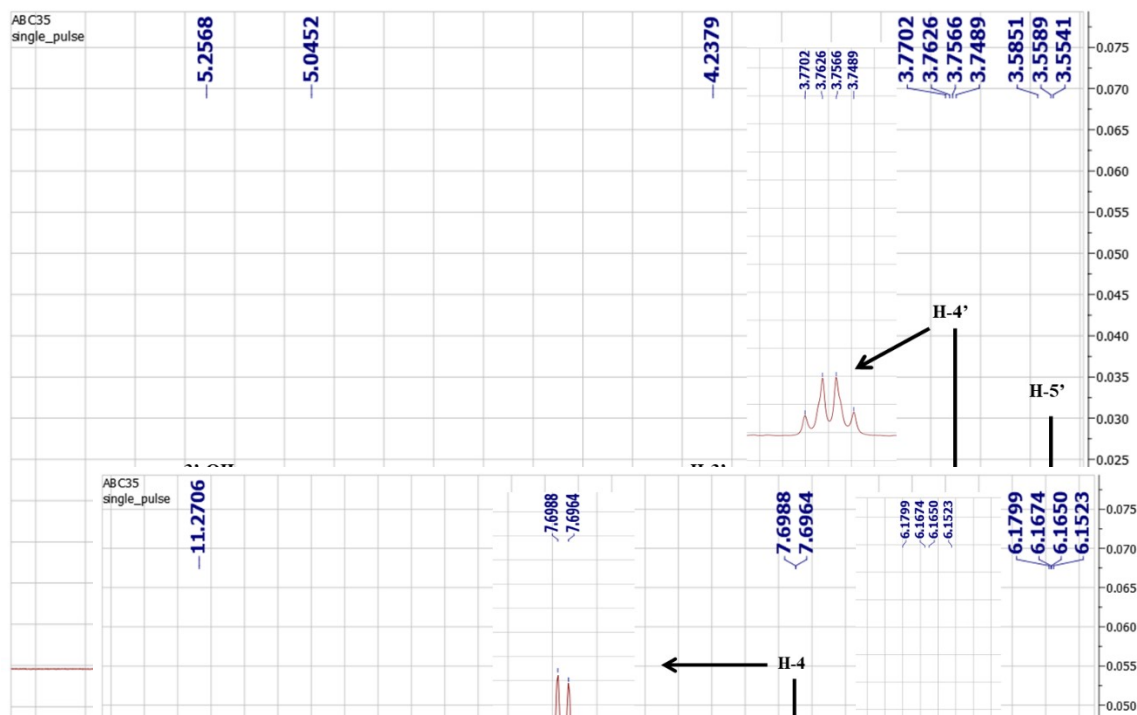

Figure S14: Expanded  $^1\text{H}$ - NMR spectrum of compound **3** (DMSO- $d_6$ , 500 MHz)

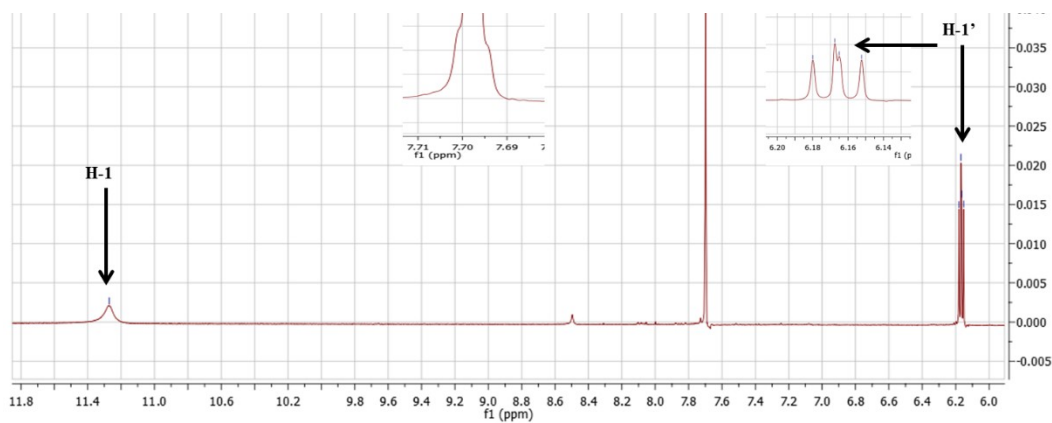



**Figure S15:** Expanded  $^1\text{H}$ - NMR spectrum of compound **3** (DMSO- $d_6$ , 500 MHz)

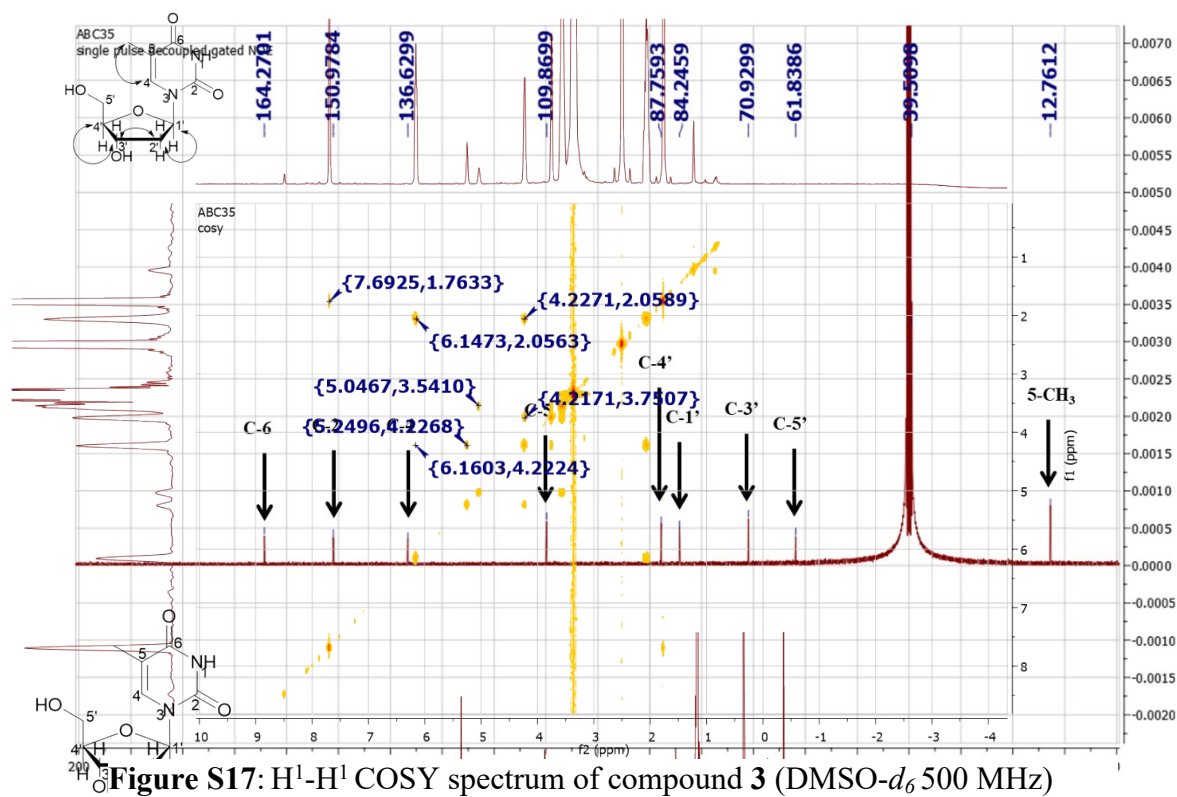

**Figure S16:**  $^{13}\text{C}$ - NMR spectrum of compound **3** (DMSO- $d_6$ , 125 MHz)

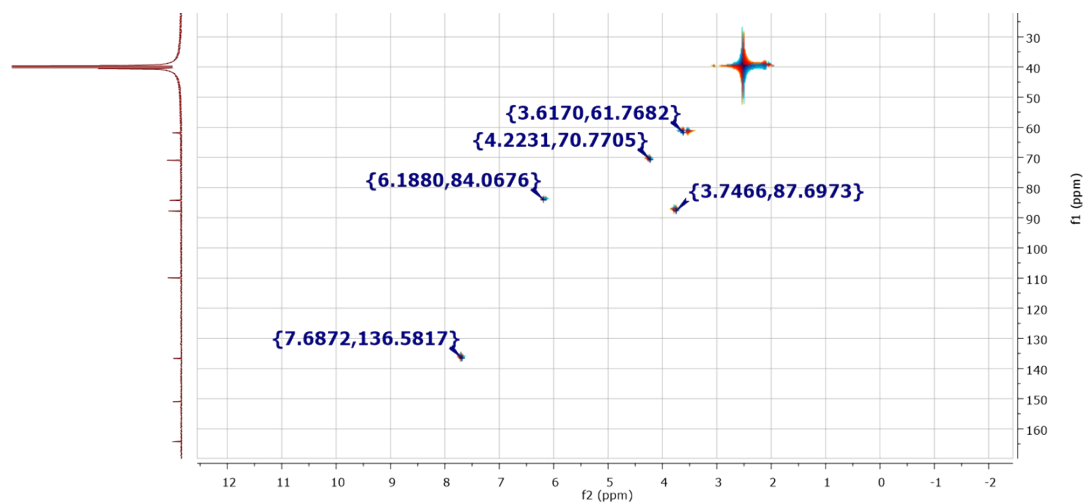

**Figure S18:** HSQC spectrum of compound **3** (DMSO-*d*<sub>6</sub>, 500 MHz)

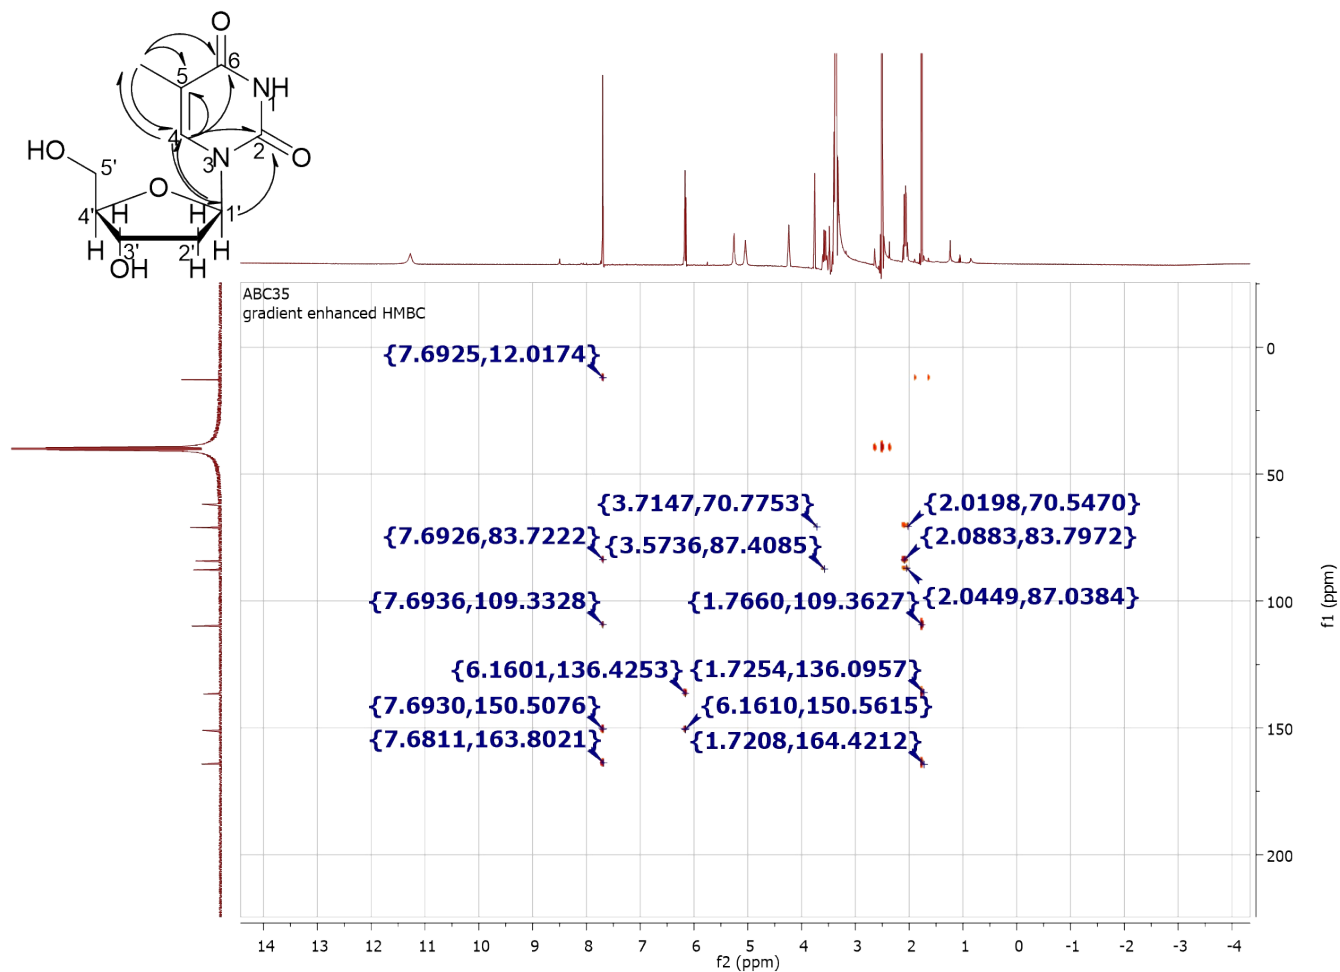

Figure S19: HMBC spectrum of compound 3 (DMSO-*d*<sub>6</sub>, 500 MHz)

**NMR spectroscopic analysis of compound (4):**

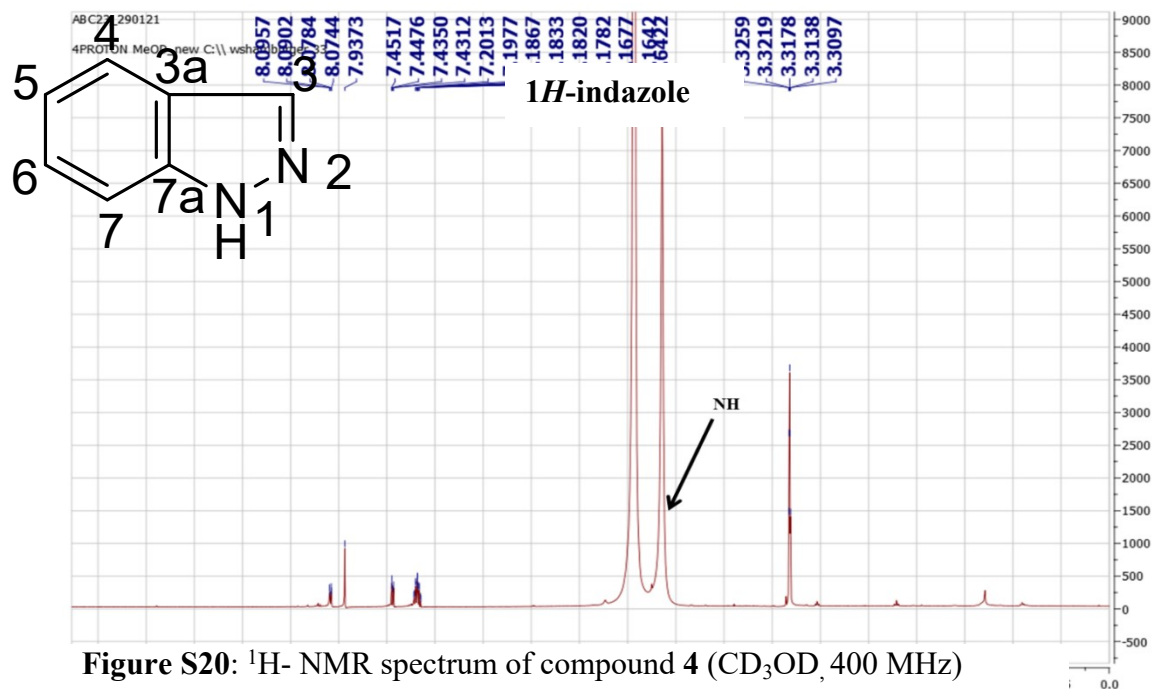

Figure S20: <sup>1</sup>H- NMR spectrum of compound 4 (CD<sub>3</sub>OD, 400 MHz)

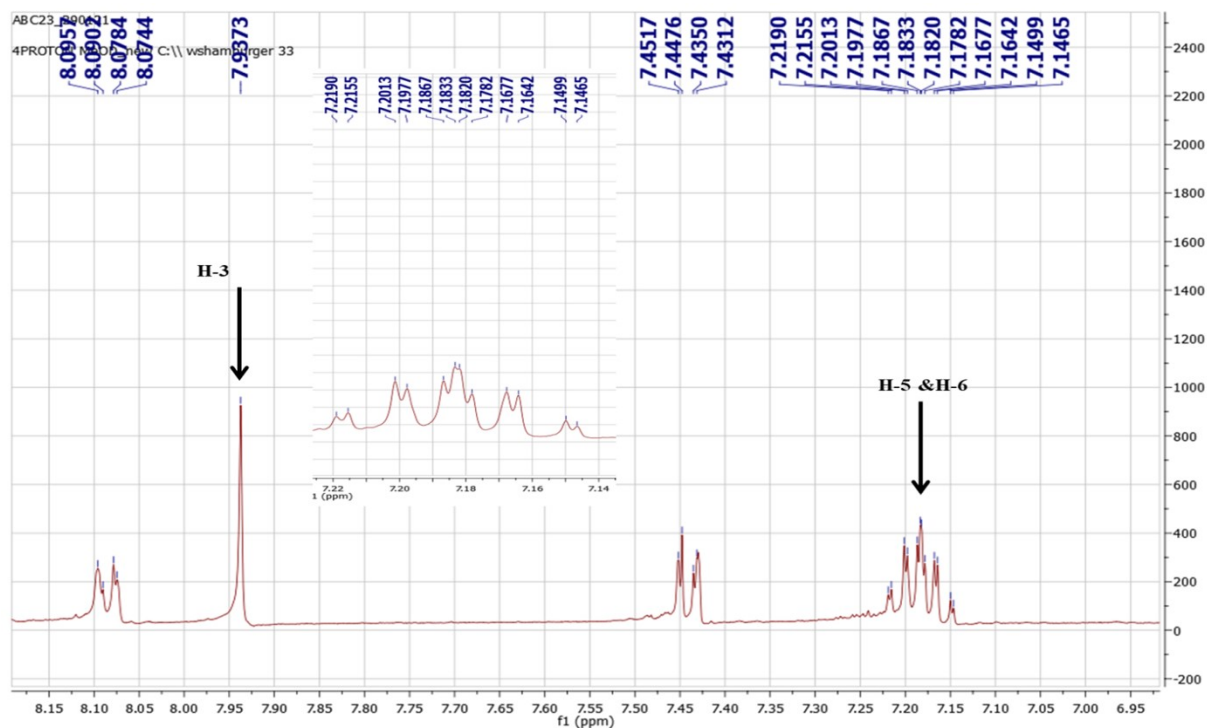

Figure S21: Expanded  $^1\text{H}$ - NMR spectrum of compound **4** ( $\text{CD}_3\text{OD}$ , 400 MHz)

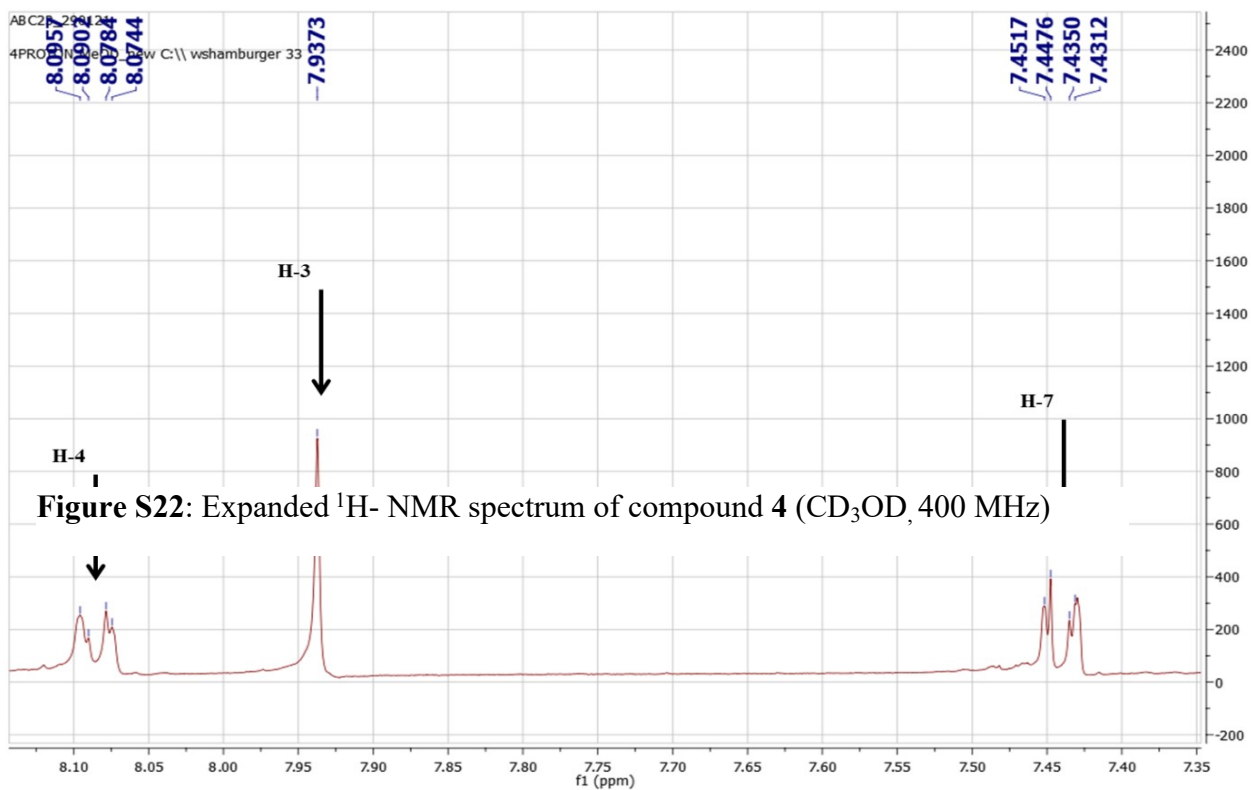

Figure S22: Expanded  $^1\text{H}$ - NMR spectrum of compound **4** ( $\text{CD}_3\text{OD}$ , 400 MHz)

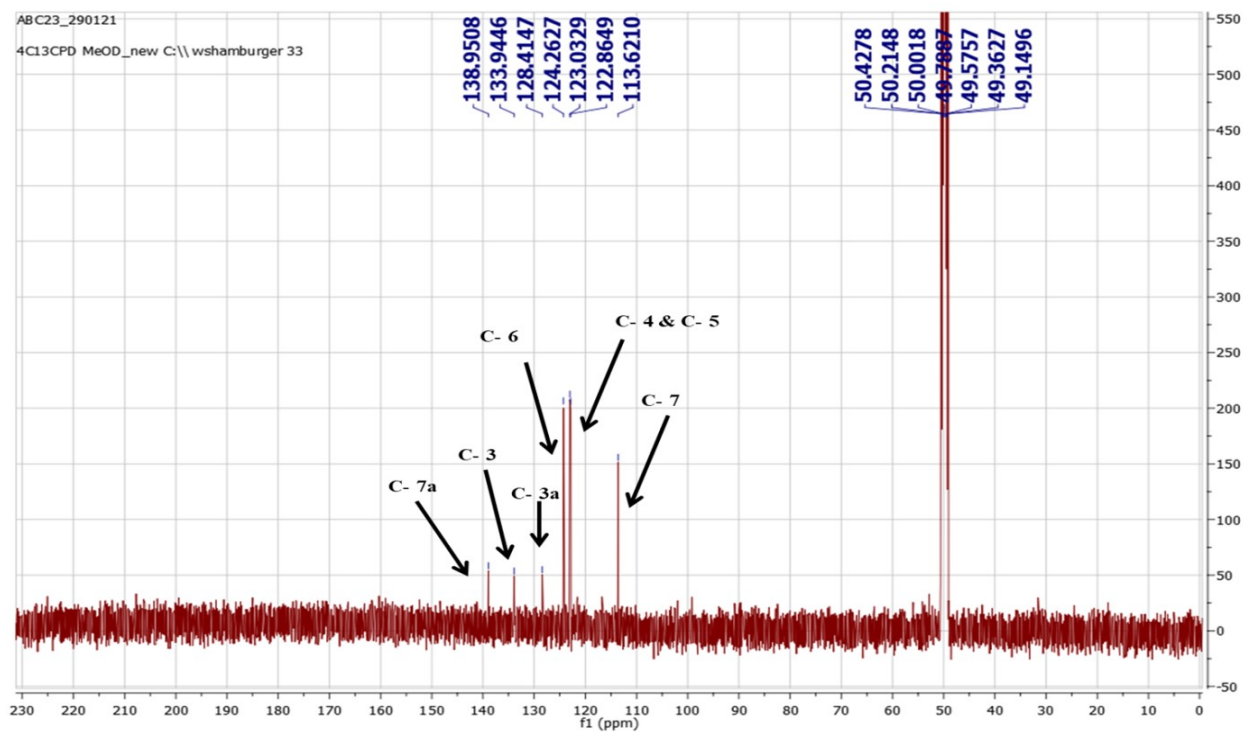

Figure S23:  $^{13}\text{C}$ - NMR spectrum of compound 4 ( $\text{CD}_3\text{OD}$ , 100 MHz)

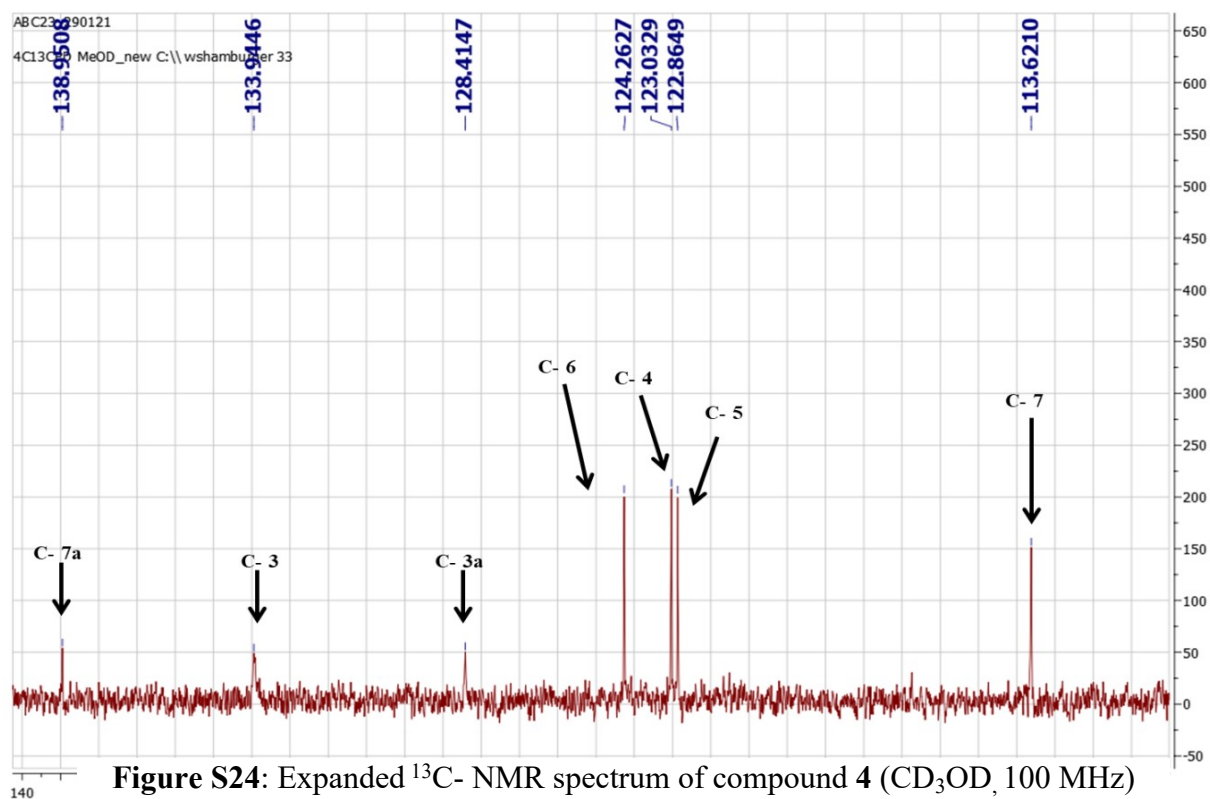

Figure S24: Expanded  $^{13}\text{C}$ - NMR spectrum of compound 4 ( $\text{CD}_3\text{OD}$ , 100 MHz)

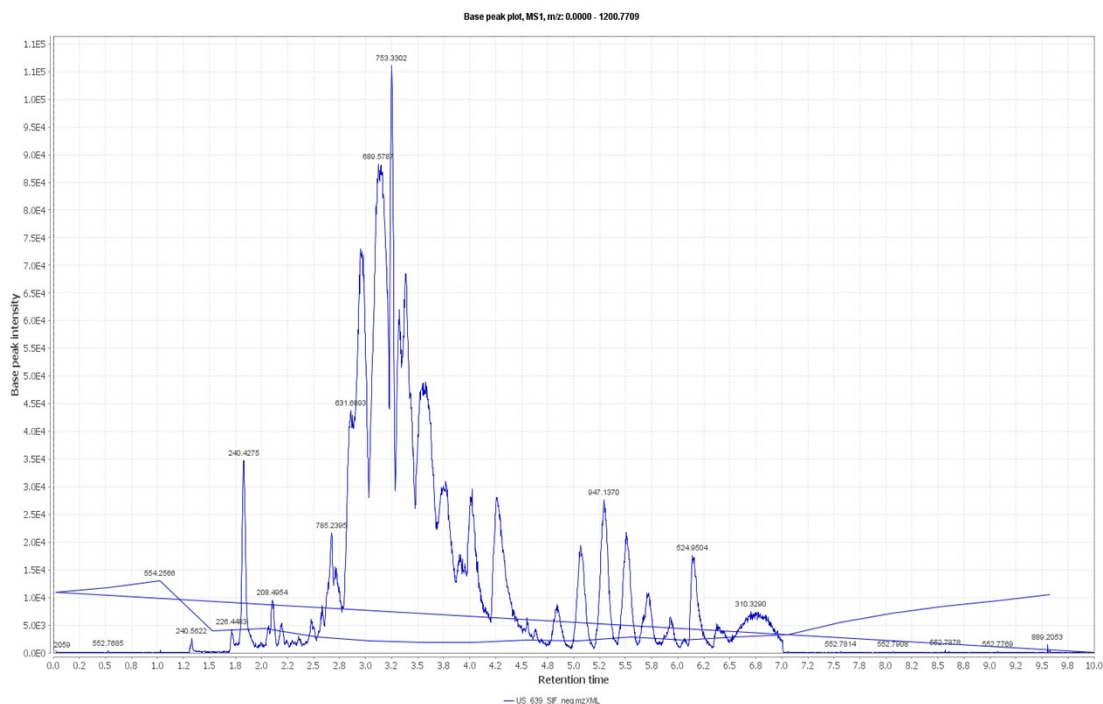

**Figure S25:** Total ion chromatogram of the ethyl acetate fraction of *Spongia irregularis*.

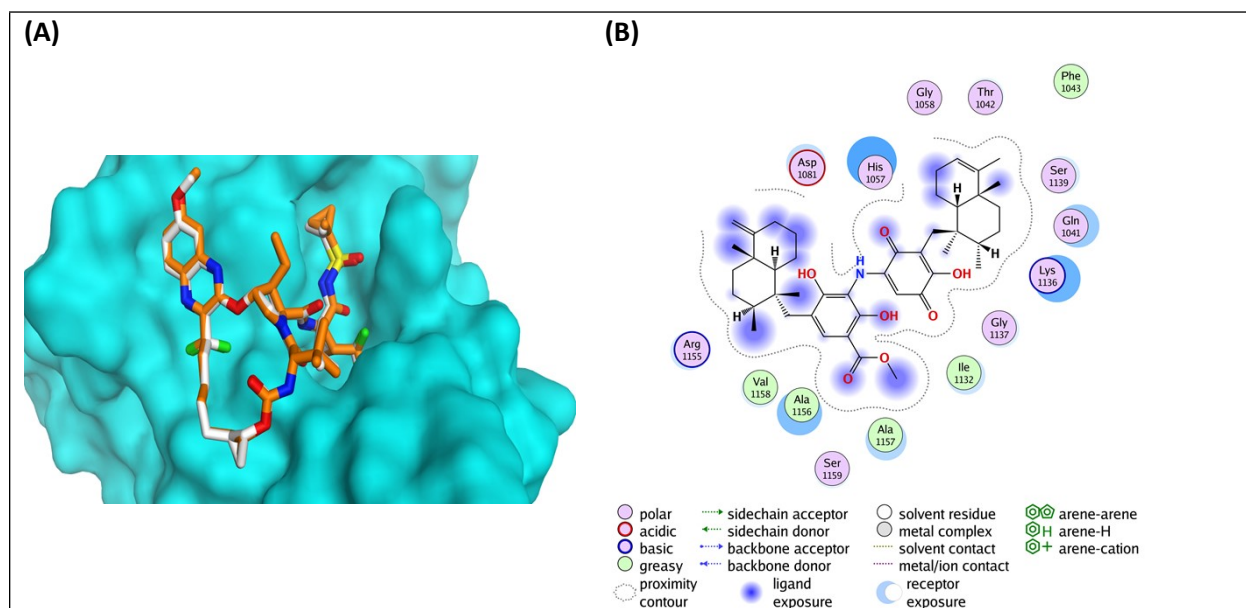

**Figure S26:**(A) Comparison of modelled binding mode of the co-crystallized ligand (white stick model) and its superposed docking conformation (orange stick model) within the HCV NS3 protease active site (PDB code 6NZZ) as predicted by MOE 2019.01. (B) 2D depiction of compound **13** binding interactions with the critical amino acid residue within the HCV NS3 protease active site (PDB code 6NZZ) as predicted by MOE 2019.01.



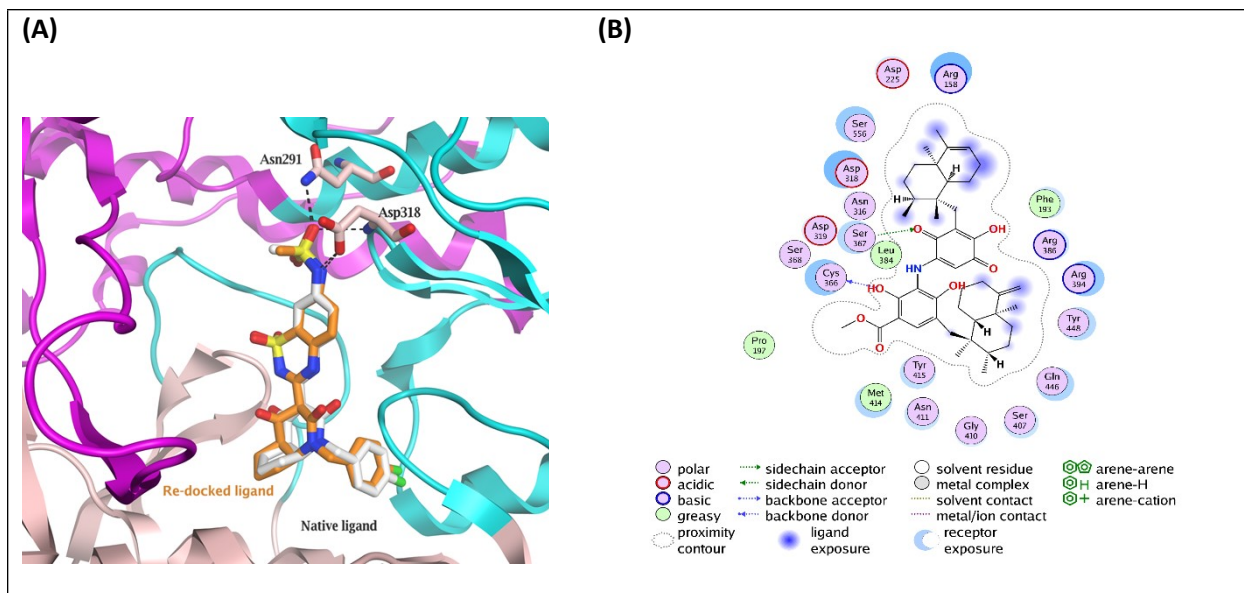

**Figure S27:**(A) Comparison of modelled binding mode of the co-crystallized ligand (white stick model) and its superposed re-docked conformation (orange stick model) within the HCV NS5B polymerase active site (PDB code: 3H2L) as predicted by MOE 2019.01. (B) 2D depiction of compound **13** binding interactions with the critical amino acid residue within the HCV NS5B polymerase active site (PDB code: 3H2L) as predicted by MOE 2019.01.

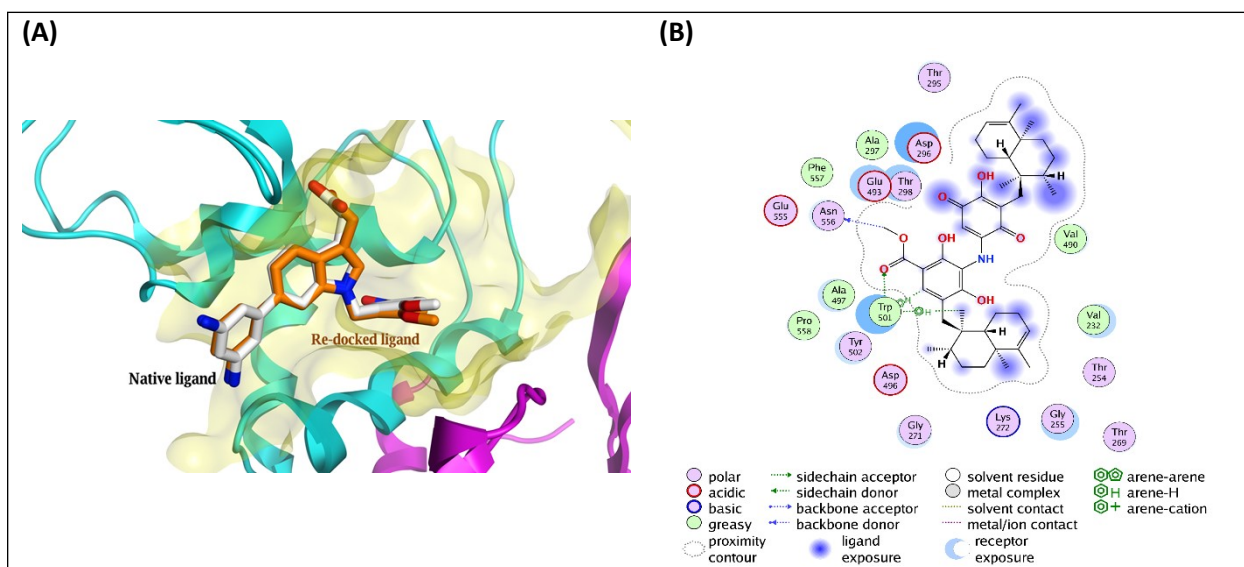

**Figure S28:**(A) Comparison of modelled binding mode of the native ligand (white stick model) and its superposed re-docked conformation (orange stick model) within the HCV NS3 Helicase active site (PDB code 4OKS) as predicted by MOE 2019.01. (B) 2D depiction of compound **14** binding interactions with the critical amino acid residue within the HCV NS3 Helicase active site (PDB code 4OKS) as predicted by MOE 2019.01.

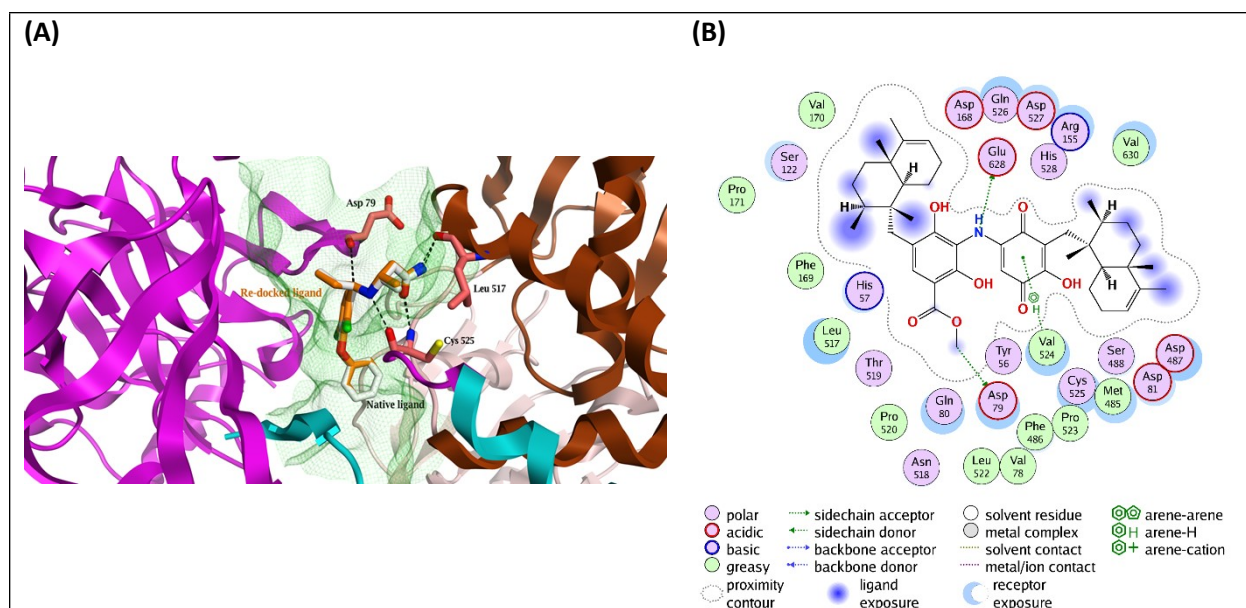

**Figure S29:**(A) Comparison of modelled binding mode of the native ligand (white stick model) and its superposed re-docked conformation (orange stick model) within the HCV NS3–NS4A protein, located between the protease and helicase domains of the HCV NS3 protein (PDB code: 4B73) as predicted by MOE 2019.01. (B) 2D depiction of compound **14** binding interactions with the critical amino acid residue within the HCV NS3–NS4A protein, located between the protease and helicase domains of the HCV NS3 protein (PDB code: 4B73) as predicted by MOE 2019.01.

## References:

1. A. R. Carroll, J. Lamb, R. Moni, J. N. A. Hooper and R. J. Quinn, *J. Nat. Prod.*, 2008, **71**, 884-886.
2. L. P. Ponomarenko, A. I. Kalinovskiy, S. S. Afiyatulloev, M. A. Pushilin, A. V. Gerasimenko, V. B. Krasokhin and V. A. Stonik, *J. Nat. Prod.*, 2007, **70**, 1110-1113.
3. T. Jomori, A. Setiawan, M. Sasaoka and M. Arai, *Nat. Prod. Commun.*, 2019, **14**, 1-7.
4. S. Urban and R. J. Capon, *J. Nat. Prod.*, 1992, **55**, 1638-1642.
5. K. Kobayashi, H. Shimogawa, A. Sakakura, T. Teruya, K. Suenaga and H. Kigoshi, *Chem. Lett.*, 2004, **33**, 1262-1263.
6. K. S. Craig, D. E. Williams, I. Hollander, E. Frommer, R. Mallon, K. Collins, D. Wojciechowicz, A. Tahir, R. Van Soest and R. J. Andersen, *Tetrahedron Lett.*, 2002, **43**, 4801-4804.
7. I. Erdogan Orhan, J. Tanaka, T. Higa and B. Sener, *Nat. Prod. Sci.*, 1999, **5**, 177-180.
8. Y. Takahashi, T. Kubota and J. i. Kobayashi, *Biorg. Med. Chem.*, 2009, **17**, 2185-2188.
